# Supplementary material for: Cognitive requirements of cumulative culture: teaching is useful but not essential
Source: PubMed Central journal article supplement (PMC4660383; doi:10.1038/srep16781), 2015-11-26

## SUPPLEMENTARY MATERIAL

### **Cognitive requirements of cumulative culture: teaching is useful but not essential.**

**Elena Zwirner<sup>1,2</sup> & Alex Thornton<sup>1</sup>**

<sup>1</sup>Centre for Ecology and Conservation, University of Exeter, Penryn Campus, Penryn, UK

<sup>2</sup>Department of Genetics, Evolution and Environment, University College London, UK

**Table S1:** Top ten most successful final-generation baskets

| <b>Rank</b> | <b>Mass of rice carried (g)</b> | <b>Treatment</b> |
|-------------|---------------------------------|------------------|
| 1           | 12070                           | T                |
| 2           | 12015                           | T                |
| 3           | 11008                           | T                |
| 4           | 10228                           | T                |
| 5           | 9393                            | A                |
| 6           | 8916                            | I                |
| 7           | 7548                            | E                |
| 8           | 6445                            | T                |
| 9           | 6360                            | T                |
| 10          | 5827                            | I                |

**Figure S1:** Basket efficacy across all 10 experimental groups in every treatment. A: Asocial; E: Emulation; I: Imitation; T: Teaching. Separate LMM analyses on each treatment confirmed that across all treatments the mass of rice carried increased across generations; statistical results are given in the legends. Group number was fitted as a random term.

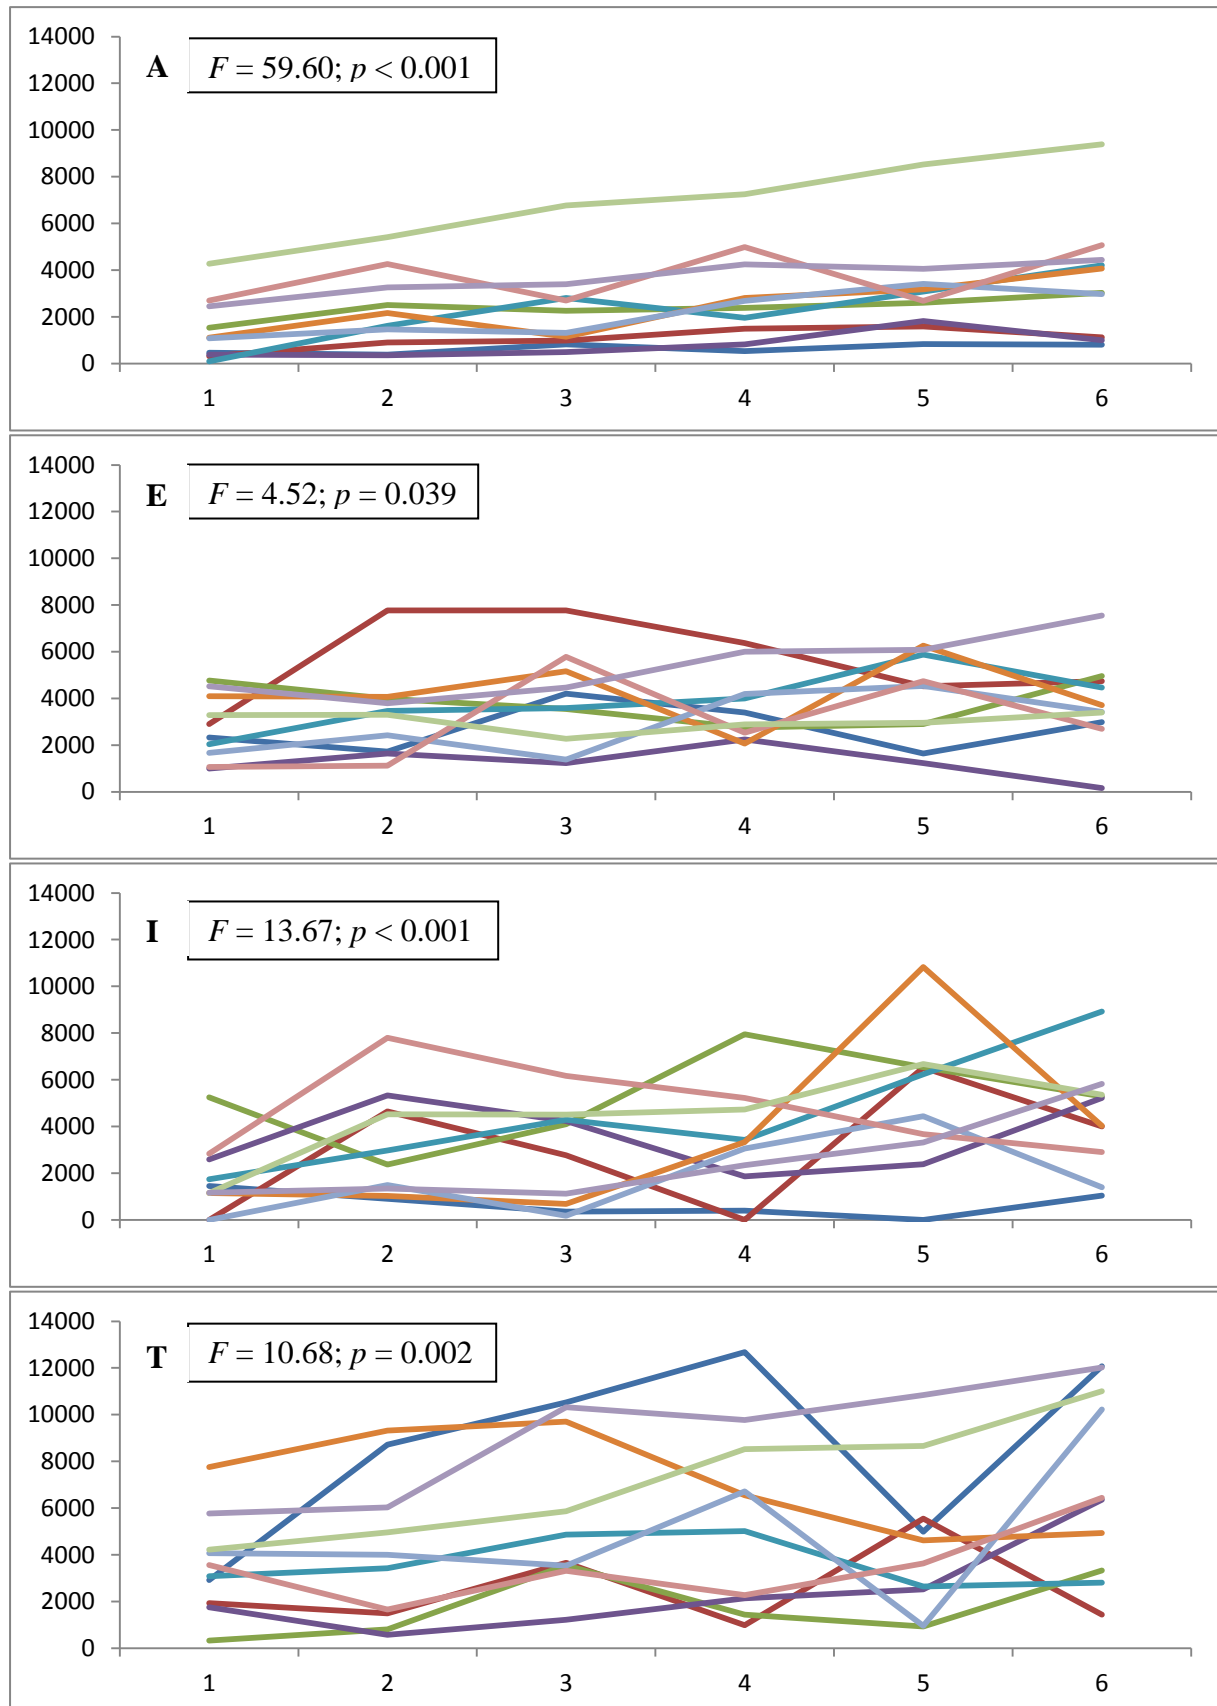

Supplement: srep16781-s1.pdf [file srep16781-s1.pdf]
